# Supplementary material
Source: PubMed Central journal article supplement (PMC2667359)

**Supplemental Table 1. DIGE experimental design**

**Cytosolic fractions:** 9 samples (3 Mock, 3 HSV-1 4h, 3 HSV-1 8h)

| <b>GEL</b> | <b>Cy3 (50µg)</b> | <b>Cy5 (50µg)</b> | <b>Cy2 (5.5µg/sample)</b> |
|------------|-------------------|-------------------|---------------------------|
| 1          | Mock A            | HSV-1 4h B        | pooled                    |
| 2          | HSV-1 4h A        | Mock B            | pooled                    |
| 3          | Mock C            | HSV-1 8h A        | pooled                    |
| 4          | HSV-1 8h B        | HSV-1 4h C        | pooled                    |
| 5          | HSV-1 8h C        | none              | pooled                    |

**Microsomal fractions:** 9 samples (3 Mock, 3 HSV-1 4h, 3 HSV-1 8h)

| <b>GEL</b> | <b>Cy3 (50µg)</b> | <b>Cy5 (50µg)</b> | <b>Cy2 (5.5µg/sample)</b> |
|------------|-------------------|-------------------|---------------------------|
| 1          | Mock A            | HSV-1 4h B        | pooled                    |
| 2          | HSV-1 4h A        | Mock B            | pooled                    |
| 3          | Mock C            | HSV-1 8h A        | pooled                    |
| 4          | HSV-1 8h B        | HSV-1 4h C        | pooled                    |
| 5          | HSV-1 8h C        | none              | pooled                    |

DIGE experimental design and labelling strategy. Pairs of samples are reverse-labelled in order to eliminate the possibility of dye labelling bias.

**Supplemental Table 2. Phenyx submission parameters**

|                           |                                                           |                                                           |
|---------------------------|-----------------------------------------------------------|-----------------------------------------------------------|
| <b>Scoring model</b>      | ESI-QTOF (Default)                                        |                                                           |
| <b>Parent charge</b>      | 2,3,4 (trust=yes)                                         |                                                           |
| <b>Rounds</b>             | <b>1</b>                                                  | <b>2</b>                                                  |
| <b>Modifications</b>      | Cys_CAM [fixed]<br>Oxidation_M [variable]                 | Cys_CAM [fixed]<br>Oxidation_M [variable]                 |
| <b>Enzyme</b>             | trypsin<br>miss cleav. 1<br>cleav. Mode= normal           | trypsin<br>miss cleav. 2<br>cleav. Mode= normal           |
| <b>AC score</b>           | 6                                                         | 6                                                         |
| <b>Peptide Thresholds</b> | length >=6<br>score >=5.0<br>p-value <=1.0E-4             | length >=6<br>score >=5.0<br>p-value <=1.0E-4             |
| <b>Parent tolerance</b>   | 50.0ppm                                                   | 0.1Da                                                     |
| <b>Turbo scoring</b>      | tolerance=800.0ppm<br>coverage>=0.2<br>series=b;b++;y;y++ | tolerance=800.0ppm<br>coverage>=0.2<br>series=b;b++;y;y++ |

The first round parameters need to be stringent enough to sufficiently validate protein identification. The second round parameters make it possible to open the search criteria to increase the sequence coverage, by searching for combinatorial modifications or other features. A two-round search therefore identifies proteins according to a first set of parameters and then performs a more exhaustive search on the proteins while saving computation time and reducing the random match rate.

**Scoring model:** refers to the algorithm that generates the score between experimental and theoretical masses, dependent upon the instrument type.

**Parent charge:** refers to the charge state of the parent ions.

**Modifications:** Fixed chemical/post-translational modification that occurs for every instance of the modifiable amino acid in the protein sequence; variable modification that may occur or may not occur.

**Enzyme:** The enzyme used to digest the protein. The error allowance for enzyme inefficiency is included as number of sites per peptide that were not cut (Miss Cleav.) and as occurrence of the digestion according to the cleavage rules (one or both ends of protein) (Cleav mode).

**AC score:** Refers to the minimum significant value for a protein's accession number score. Protein matches scoring lower than this value (set at 6) are rejected from the identified proteins.

**P-value:** Statistical measure of the probability that the identification is a random match. (The lower the p-value, the more significant match).

## Supplemental material figure 1. Measurement of Beta-gal activity

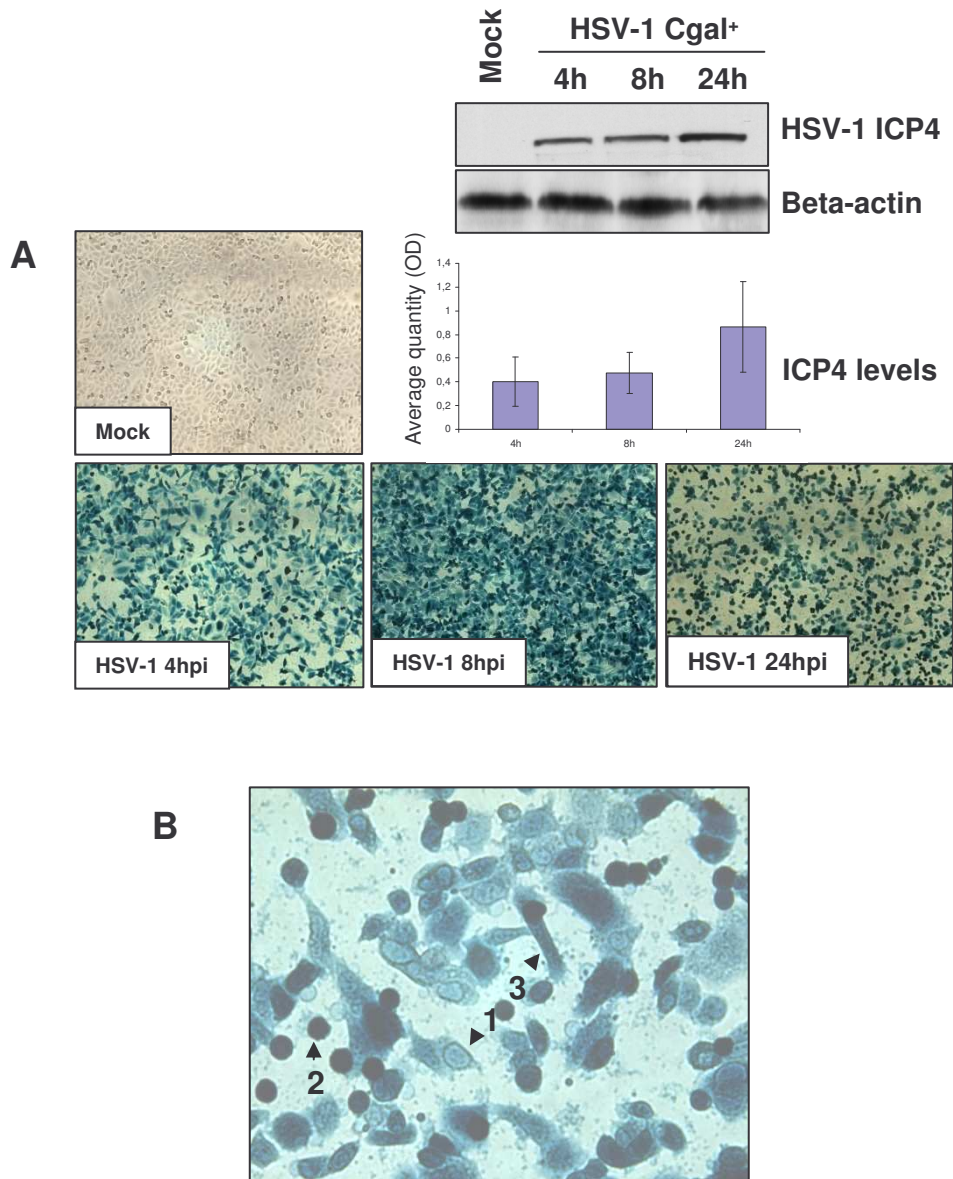

**Figure 1.**  $\beta$ -galactosidase activity staining of Huh7 cells upon HSV-1 Cgal+ infection. Human hepatoma Huh7 cells were infected with HSV-1 Cgal+ and analyzed 4, 8 and 24 hpi. HSV-1 ICP4 protein was evidenced by Western blot analysis. The bar plot shows an average $\pm$ SD of the OD intensities in all 9 independent experiments (A). Infected cells were positive for b-gal staining 4, 8, and 24 hpi (A). 24 hpi large cytoplasmic vacuoles (1), cell rounding (2), and detachment (3) were observed, indicating the HSV-induced cytopathic effect (B). Equal protein loading was demonstrated using an antibody against b-actin. A representative case of three independent experiments is shown.

**Supplemental material figure 2.**

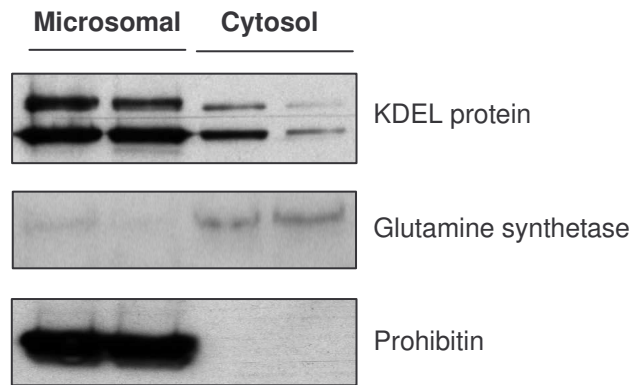

**Quality control of isolated organelles in Huh7 cells.** Western blotting were performed using specific antibodies against KDEL (ER marker), glutamine synthase (cytoplasmic protein) and prohibitin (mitochondrial marker).

Supplemental material figure 3.

Signaling intermediates altered by HSV-1 Cgal<sup>+</sup> infection

Survival intermediates altered by HSV-1 Cgal<sup>+</sup> infection

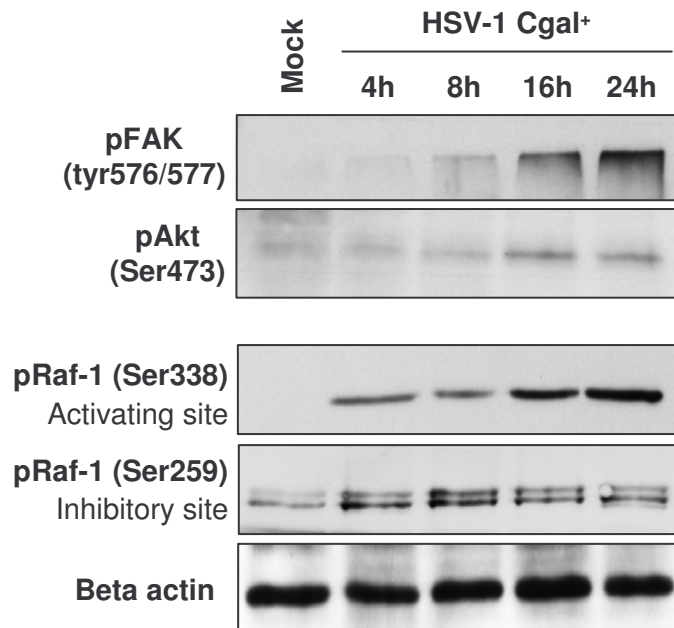

Apoptotic intermediates altered by HSV-1 Cgal<sup>+</sup> infection

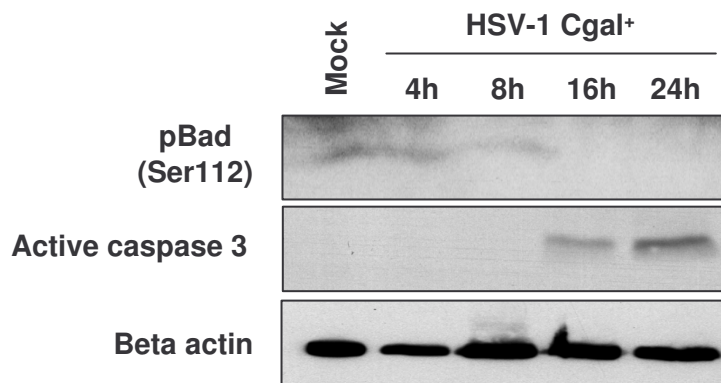

## MS/MS data from differential cytosolic proteins

| Spot                      | AC     | Protein name                                                                     | pl       | MW         | score        | cvg%           | peptides       |                 |
|---------------------------|--------|----------------------------------------------------------------------------------|----------|------------|--------------|----------------|----------------|-----------------|
| 719                       | P30154 | Serine/threonine-protein phosphatase 2A 65 kDa regulatory subunit A beta isoform | 4.84     | 66214      | 26,18        | 6              | 4              |                 |
| <b>Sequenced peptides</b> |        |                                                                                  | <b>z</b> | <b>m/z</b> | <b>d m/z</b> | <b>z-score</b> | <b>p-value</b> | <b>position</b> |
|                           |        |                                                                                  | 2        | 621,89     | -0,015       | 7,75           | 8,56E-12       | 47-58           |
|                           |        |                                                                                  | 2        | 437,237    | -0,012       | 6,37           | 9,94E-07       | 34-40           |
|                           |        |                                                                                  | 2        | 459,271    | -0,014       | 6,27           | 1,52E-06       | 118-125         |
|                           |        |                                                                                  | 2        | 583,275    | -0,019       | 5,78           | 2,21E-05       | 579-588         |
| Spot                      | AC     | Protein name                                                                     | pl       | MW         | score        | cvg%           | peptides       |                 |
| 875                       | P61978 | Heterogeneous nuclear ribonucleoprotein K. [ISOFORM 2]                           | 5.39     | 50976      | 36,43        | 11             | 5              |                 |
| <b>Sequenced peptides</b> |        |                                                                                  | <b>z</b> | <b>m/z</b> | <b>d m/z</b> | <b>z-score</b> | <b>p-value</b> | <b>position</b> |
|                           |        |                                                                                  | 2        | 561,776    | -0,017       | 8,44           | 1,28E-13       | 38-46           |
|                           |        |                                                                                  | 2        | 549,738    | -0,008       | 6,46           | 1,28E-07       | 140-148         |
|                           |        |                                                                                  | 2        | 597,87     | -0,013       | 6,96           | 2,99E-09       | 306-316         |
|                           |        |                                                                                  | 2        | 437,27     | -0,013       | 6,05           | 5,33E-06       | 397-405         |
|                           |        |                                                                                  | 2        | 630,31     | -0,017       | 7,9            | 9,33E-12       | 423-433         |
| Spot                      | AC     | Protein name                                                                     | pl       | MW         | score        | cvg%           | peptides       |                 |
| 978                       | Q02790 | 52 kDa FK506-binding protein                                                     | 5.35     | 51805      | 14,11        | 4              | 2              |                 |
| <b>Sequenced peptides</b> |        |                                                                                  | <b>z</b> | <b>m/z</b> | <b>d m/z</b> | <b>z-score</b> | <b>p-value</b> | <b>position</b> |
|                           |        |                                                                                  | 2        | 566,782    | -0,004       | 8,27           | 5,12E-13       | 344-353         |
|                           |        |                                                                                  | 2        | 530,269    | -0,018       | 5,84           | 2,15E-05       | 409-416         |
| Spot                      | AC     | Protein name                                                                     | pl       | MW         | score        | cvg%           | peptides       |                 |
| 1002                      | Q02790 | 52 kDa FK506-binding protein                                                     | 5.35     | 51805      | 56,85        | 16             | 7              |                 |
| <b>Sequenced peptides</b> |        |                                                                                  | <b>z</b> | <b>m/z</b> | <b>d m/z</b> | <b>z-score</b> | <b>p-value</b> | <b>position</b> |
|                           |        |                                                                                  | 2        | 566,79     | -0,011       | 9,52           | 7,65E-18       | 344-353         |
|                           |        |                                                                                  | 2        | 719,87     | -0,013       | 9,46           | 1,17E-17       | 331-343         |
|                           |        |                                                                                  | 2        | 690,33     | -0,016       | 9,36           | 2,41E-17       | 39-51           |
|                           |        |                                                                                  | 2        | 531,31     | -0,012       | 9,31           | 3,21E-17       | 378-386         |
|                           |        |                                                                                  | 2        | 530,26     | -0,011       | 6,83           | 2,56E-08       | 409-416         |
|                           |        |                                                                                  | 2        | 484,26     | -0,014       | 6,65           | 1,01E-07       | 66-73           |
|                           |        |                                                                                  | 2        | 561,30     | -0,010       | 5,72           | 4,91E-05       | 88-97           |
| Spot                      | AC     | Protein name                                                                     | pl       | MW         | score        | cvg%           | peptides       |                 |
| 1071                      | Q92599 | Septin-8. [ISOFORM 2]                                                            | 5.89     | 55756      | 19,83        | 6              | 3              |                 |
| <b>Sequenced peptides</b> |        |                                                                                  | <b>z</b> | <b>m/z</b> | <b>d m/z</b> | <b>z-score</b> | <b>p-value</b> | <b>position</b> |
|                           |        |                                                                                  | 2        | 490,827    | 0,002        | 7,17           | 2,14E-10       | 179-187         |
|                           |        |                                                                                  | 2        | 446,72     | -0,002       | 6,35           | 7,91E-07       | 283-289         |
|                           |        |                                                                                  | 2        | 511,27     | 0            | 6,3            | 1,51E-06       | 332-339         |
| Spot                      | AC     | Protein name                                                                     | pl       | MW         | score        | cvg%           | peptides       |                 |
| 1344                      | Q9HB07 | UPF0160 protein MYG1                                                             | 6.25     | 42450      | 21,39        | 9              | 3              |                 |
| <b>Sequenced peptides</b> |        |                                                                                  | <b>z</b> | <b>m/z</b> | <b>d m/z</b> | <b>z-score</b> | <b>p-value</b> | <b>position</b> |
|                           |        |                                                                                  | 2        | 548,41     | -0,004       | 7,82           | 2,31E-12       | 189-198         |
|                           |        |                                                                                  | 2        | 747,87     | -0,007       | 7,14           | 5,10E-10       | 220-231         |
|                           |        |                                                                                  | 2        | 550,32     | -0,007       | 6,44           | 5,09E-08       | 244-253         |
| Spot                      | AC     | Protein name                                                                     | pl       | MW         | score        | cvg%           | peptides       |                 |
| 1394                      | P35237 | Serpin B6                                                                        | 5.18     | 42590      | 15,28        | 9              | 2              |                 |
| <b>Sequenced peptides</b> |        |                                                                                  | <b>z</b> | <b>m/z</b> | <b>d m/z</b> | <b>z-score</b> | <b>p-value</b> | <b>position</b> |
|                           |        |                                                                                  | 2        | 476,28     | -0,008       | 7,22           | 1,42E-09       | 82-89           |
|                           |        |                                                                                  | 2        | 519,27     | -0,006       | 6,18           | 2,65E-06       | 364-372         |
| Spot                      | AC     | Protein name                                                                     | pl       | MW         | score        | cvg%           | peptides       |                 |
| 1396                      | P40121 | Macrophage capping protein (Myc basic motif homolog 1)                           | 6.73     | 39240      | 15,33        | 7              | 2              |                 |
| <b>Sequenced peptides</b> |        |                                                                                  | <b>z</b> | <b>m/z</b> | <b>d m/z</b> | <b>z-score</b> | <b>p-value</b> | <b>position</b> |
|                           |        |                                                                                  | 2        | 640,82     | -0,012       | 7,58           | 1,40E-10       | 254-265         |
|                           |        |                                                                                  | 2        | 801,43     | 0,015        | 7,75           | 2,99E-11       | 326-339         |

| Spot                      | AC     | Protein name                                                                  | pl       | MW         | score        | cvg%           | peptides       |                 |
|---------------------------|--------|-------------------------------------------------------------------------------|----------|------------|--------------|----------------|----------------|-----------------|
| 1511                      | Q13347 | Eukaryotic translation initiation factor 3 subunit 2 (eIF-3 beta) (eIF3 p36). | 5.38     | 36502      | 39,46        | 15             | 5              |                 |
| <b>Sequenced peptides</b> |        |                                                                               | <b>z</b> | <b>m/z</b> | <b>d m/z</b> | <b>z-score</b> | <b>p-value</b> | <b>position</b> |
| EGDLLFTVAK                |        |                                                                               | 2        | 546,81     | -0,009       | 7,37           | 5,96E-10       | 21-30           |
| SGEVLVNVK                 |        |                                                                               | 2        | 472,79     | -0,014       | 8,28           | 4,16E-13       | 177-185         |
| QINDIQLSR                 |        |                                                                               | 2        | 543,8      | -0,0015      | 7,37           | 7,12E-10       | 190-198         |
| DMTMFVTASK                |        |                                                                               | 2        | 581,76     | -0,001       | 9,86           | 1E-19          | 199-208         |
| SYSSGGEDGYVR              |        |                                                                               | 2        | 638,78     | -0,002       | 6,57           | 5,63E-08       | 299-310         |

| Spot                      | AC     | Protein name                                    | pl       | MW         | score        | cvg%           | peptides       |                 |
|---------------------------|--------|-------------------------------------------------|----------|------------|--------------|----------------|----------------|-----------------|
| 2011                      | P63029 | Translationally-controlled tumor protein (TCTP) | 4.76     | 19462      | 66,69        | 37             | 6              |                 |
| <b>Sequenced peptides</b> |        |                                                 | <b>z</b> | <b>m/z</b> | <b>d m/z</b> | <b>z-score</b> | <b>p-value</b> | <b>position</b> |
| DLISHDELFSDIYK            |        |                                                 | 3        | 847,94     | -0,020       | 8,4            | 0,00132        | 6-19            |
| YIKDYMK                   |        |                                                 | 2        | 488,76     | -0,012       | 6,87           | 3,39E-08       | 91-97           |
| GKLEEQKPER                |        |                                                 | 3        | 405,23     | -0,008       | 6,21           | 1,19E-07       | 101-110         |
| VKPFMTGAAEQIK             |        |                                                 | 3        | 479,27     | -0,009       | 6,66           | 8,73E-08       | 111-123         |
| EDGVTPFMIFFK              |        |                                                 | 2        | 723,87     | -0,019       | 8,42           | 6,59E-05       | 153-164         |
| DGLEMEK                   |        |                                                 | 2        | 419,192    | -0,0055      | 6,1            | 2,49E-06       | 165-171         |

| Spot                      | AC     | Protein name                                | pl       | MW         | score        | cvg%           | peptides       |                 |
|---------------------------|--------|---------------------------------------------|----------|------------|--------------|----------------|----------------|-----------------|
| 2088                      | P04906 | Glutathione S-transferase P (GST class-pi). | 6.89     | 23439      | 16,69        | 10             | 2              |                 |
| <b>Sequenced peptides</b> |        |                                             | <b>z</b> | <b>m/z</b> | <b>d m/z</b> | <b>z-score</b> | <b>p-value</b> | <b>position</b> |
| PPYTIVYFPVR               |        |                                             | 2        | 676,38     | -0,008       | 7,73           | 2,89E-11       | 1-11            |
| STCLYGQLPK                |        |                                             | 2        | 583,81     | -0,015       | 8,97           | 1,12E-15       | 45-54           |

| Spot                      | AC     | Protein name                                       | pl       | MW         | score        | cvg%           | peptides       |                 |
|---------------------------|--------|----------------------------------------------------|----------|------------|--------------|----------------|----------------|-----------------|
| 2853                      | P09382 | Galectin-1 (Lectin galactoside-binding soluble 1). | 5.33     | 14716      | 8,68         | 12             | 2              |                 |
| <b>Sequenced peptides</b> |        |                                                    | <b>z</b> | <b>m/z</b> | <b>d m/z</b> | <b>z-score</b> | <b>p-value</b> | <b>position</b> |
| SFVLNLGK                  |        |                                                    | 2        | 439,27     | -0,008       | 8,66           | 9,41E-15       | 29-36           |
| LPDGYEFK                  |        |                                                    | 2        | 471,73     | 0,003        | 6,22           | 5,27E-05       | 101-108         |

## Differential Cytosolic proteins (I)

Ser/thre PP2A 65KDa regulatory subunit A

| 4hpi/Mock |       | 8hpi/Mock |       |
|-----------|-------|-----------|-------|
| T-test    | Ratio | T-test    | Ratio |
| 0,0012    | 1,71  | 0,0041    | 1,83  |

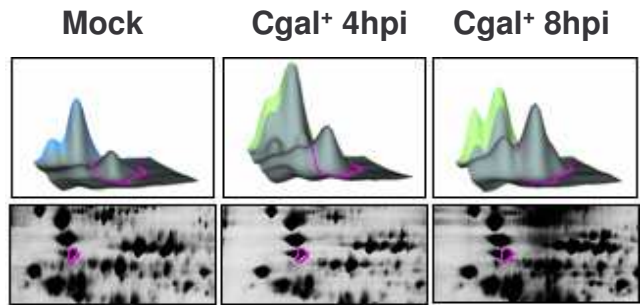

Heterogeneous nuclear ribonucleoprotein K

| 4hpi/Mock |       | 8hpi/Mock |       |
|-----------|-------|-----------|-------|
| T-test    | Ratio | T-test    | Ratio |
| 0,022     | 1,62  | 0,0033    | 2,97  |

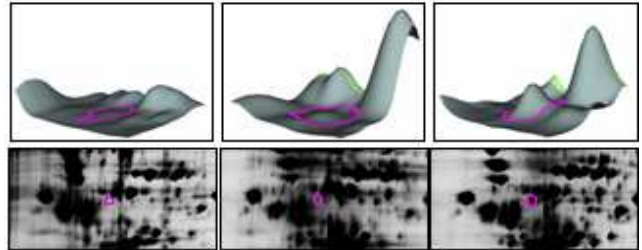

52KDa FK506-binding protein

| 4hpi/Mock |       | 8hpi/Mock |       |
|-----------|-------|-----------|-------|
| T-test    | Ratio | T-test    | Ratio |
| 0,035     | -2,37 | 8,80E-05  | -4,8  |

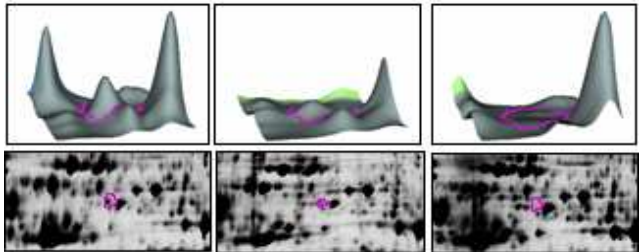

52KDa FK506-binding protein

| 4hpi/Mock |       | 8hpi/Mock |       |
|-----------|-------|-----------|-------|
| T-test    | Ratio | T-test    | Ratio |
| 0,0071    | 1,72  | 0,0071    | 2,24  |

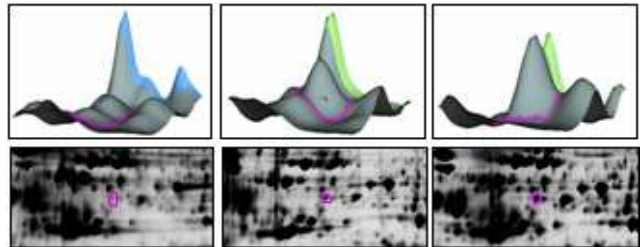

Septin 8

| 4hpi/Mock |       | 8hpi/Mock |       |
|-----------|-------|-----------|-------|
| T-test    | Ratio | T-test    | Ratio |
| 0,034     | 1,87  | 0,0031    | 2,26  |

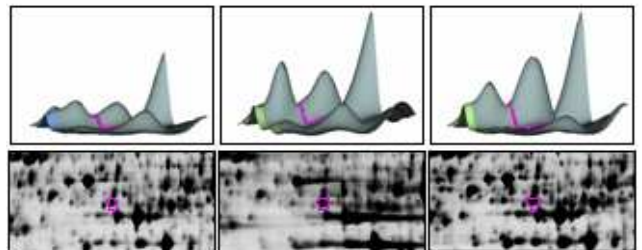

UPF0160MYG1

| 4hpi/Mock |       | 8hpi/Mock |       |
|-----------|-------|-----------|-------|
| T-test    | Ratio | T-test    | Ratio |
| 0,028     | 1,71  | 0,0024    | 1,67  |

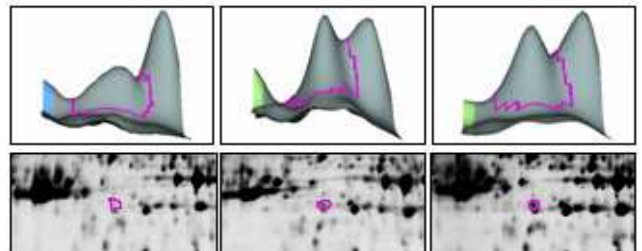



## Differential Cytosolic proteins (II)

### Serpin B6

| 4hpi/Mock |       | 8hpi/Mock |       |
|-----------|-------|-----------|-------|
| T-test    | Ratio | T-test    | Ratio |
| n.s       | n.d   | 0,013     | 1,77  |

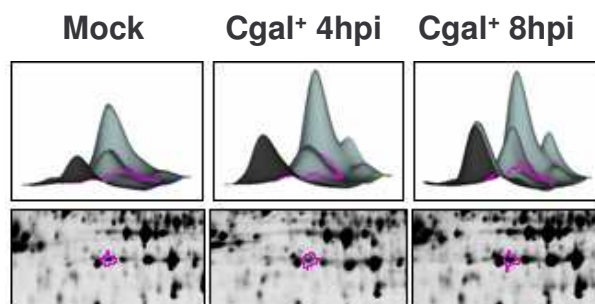

### Macrophage capping protein

| 4hpi/Mock |       | 8hpi/Mock |       |
|-----------|-------|-----------|-------|
| T-test    | Ratio | T-test    | Ratio |
| n.s       | n.d   | 0,0022    | 1,78  |

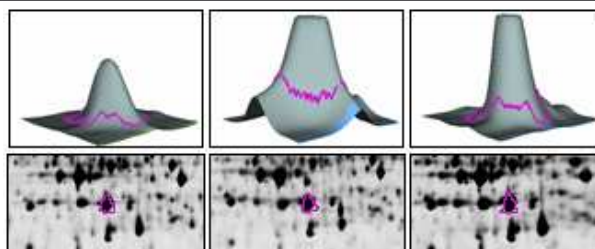

### Eukaryotic translation initiation factor 3 subunit 2

| 4hpi/Mock |       | 8hpi/Mock |       |
|-----------|-------|-----------|-------|
| T-test    | Ratio | T-test    | Ratio |
| 0,0042    | 1,95  | 0,0011    | 1,93  |

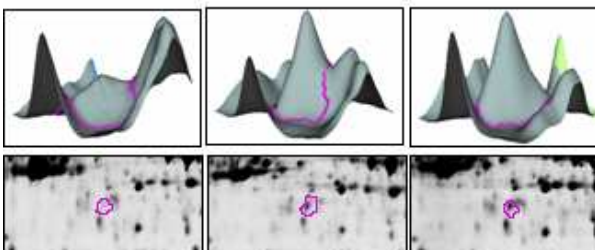

### fortilin

| 4hpi/Mock |       | 8hpi/Mock |       |
|-----------|-------|-----------|-------|
| T-test    | Ratio | T-test    | Ratio |
| 0,0037    | -1,54 | 0,035     | -1,55 |

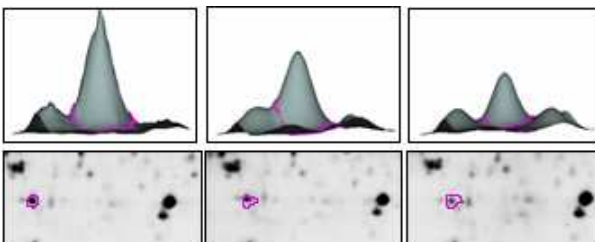

### Glutathione S-transferase P

| 4hpi/Mock |       | 8hpi/Mock |       |
|-----------|-------|-----------|-------|
| T-test    | Ratio | T-test    | Ratio |
| n.s       | n.d   | 0,0077    | 1,56  |

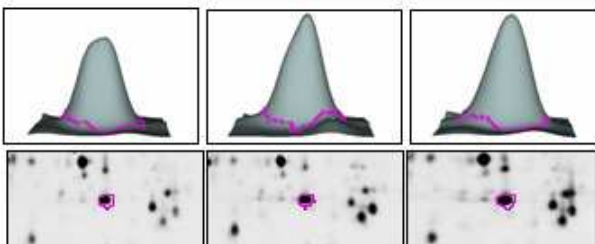

### Galectin-1

| 4hpi/Mock |       | 8hpi/Mock |       |
|-----------|-------|-----------|-------|
| T-test    | Ratio | T-test    | Ratio |
| n.s       | n.d   | 0,034     | 1,89  |

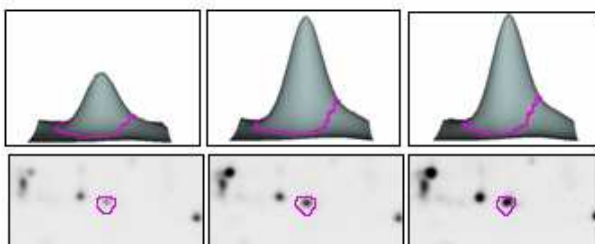

## Differential cytosolic proteins in HSV-1 Cgal<sup>+</sup>-infected Huh7 cells

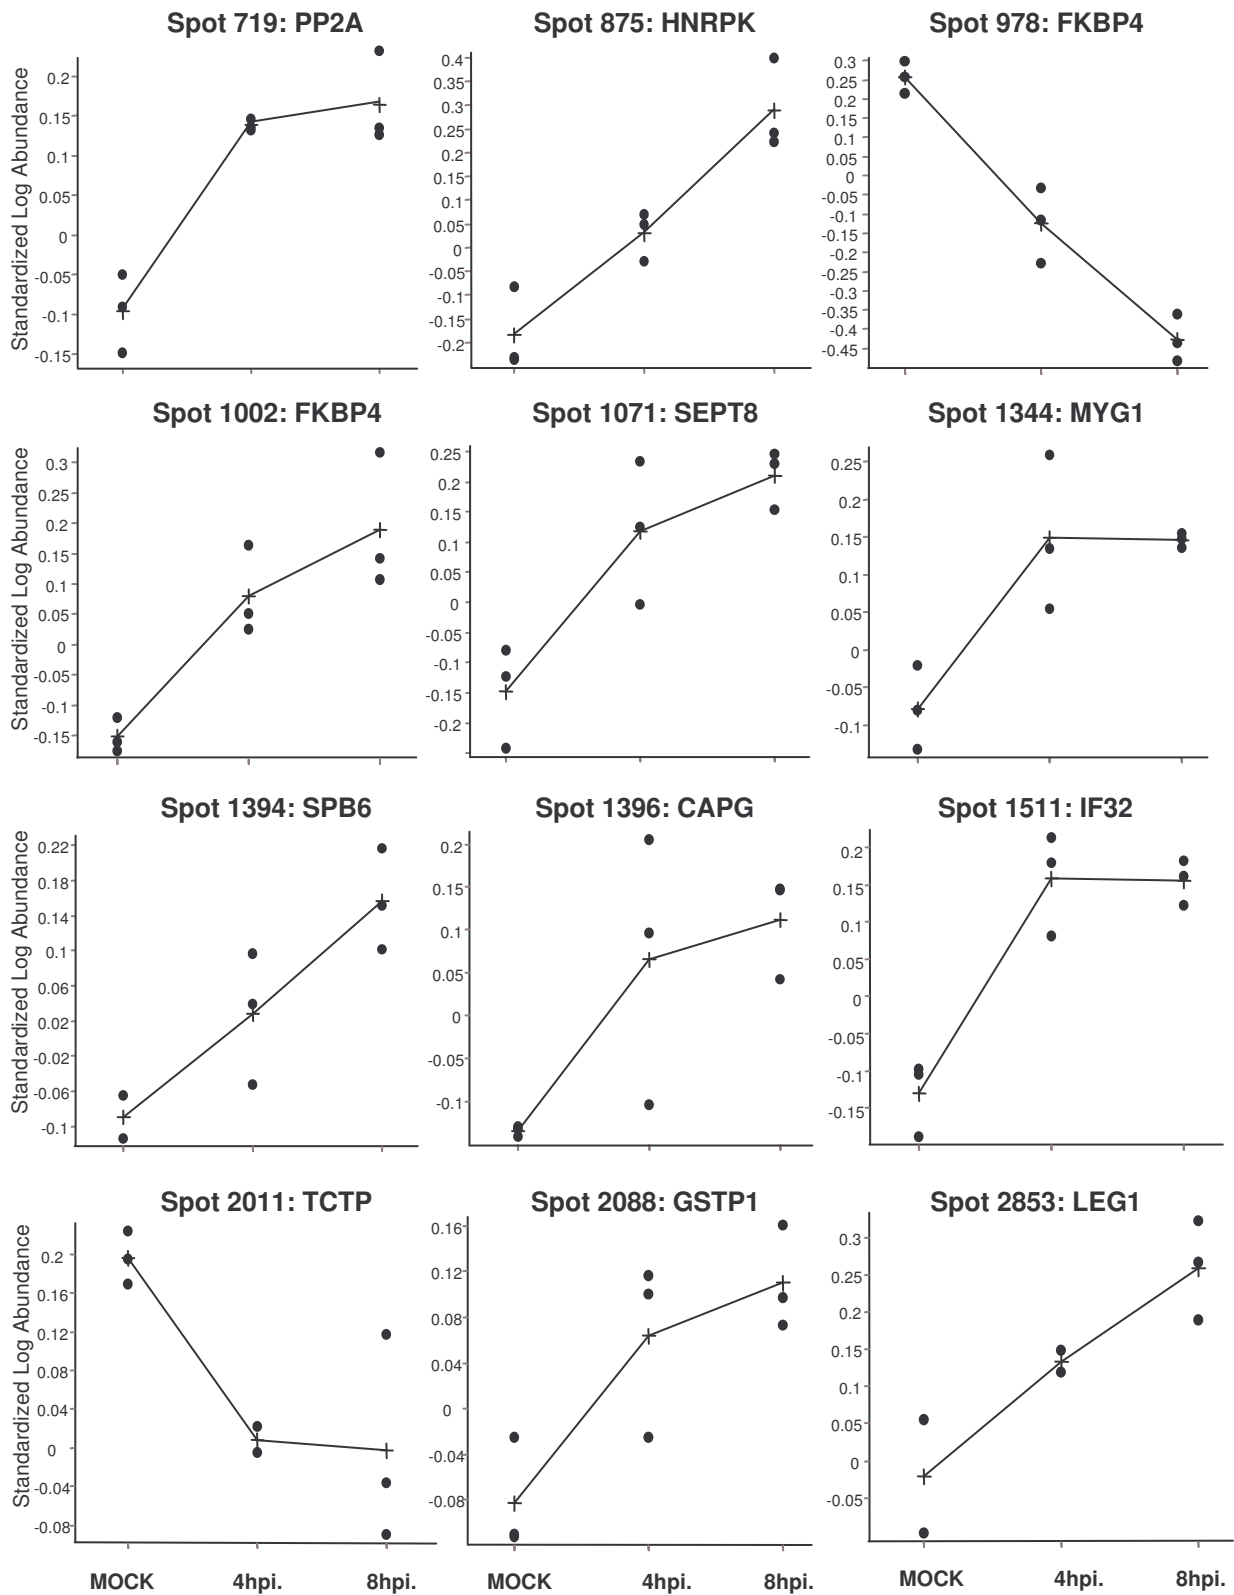

## MS/MS data from differential microsomal proteins

| Spot                      | AC     | Protein name                                                          | pI       | MW         | score        | cvg%           | peptides       |                 |
|---------------------------|--------|-----------------------------------------------------------------------|----------|------------|--------------|----------------|----------------|-----------------|
| 1231                      | Q9Y230 | RuvB-like 2 (p47 protein)                                             | 5.49     | 51157      | 31,84        | 10             | 4              |                 |
| <b>Sequenced peptides</b> |        |                                                                       | <b>z</b> | <b>m/z</b> | <b>d m/z</b> | <b>z-score</b> | <b>p-value</b> | <b>position</b> |
|                           |        |                                                                       | 2        | 578,31     | -0,008       | 9,02           | 6,11E-16       | 29-29           |
|                           |        |                                                                       | 2        | 660,83     | -0,018       | 7,2            | 2,46E-09       | 223-233         |
|                           |        |                                                                       | 2        | 882,45     | -0,017       | 6,8            | 3,67E-08       | 314-329         |
|                           |        |                                                                       | 2        | 614,82     | -0,005       | 8,82           | 4,46E-15       | 428-437         |
| Spot                      | AC     | Protein name                                                          | pI       | MW         | score        | cvg%           | peptides       |                 |
| 1611                      | Q9Y371 | SH3 domain GRB2-like protein B1 (Bax- interacting factor 1) (Bif-1).  | 5.78     | 40796      | 15,6         | 5              | 2              |                 |
| <b>Sequenced peptides</b> |        |                                                                       | <b>z</b> | <b>m/z</b> | <b>d m/z</b> | <b>z-score</b> | <b>p-value</b> | <b>position</b> |
|                           |        |                                                                       | 2        | 561,31     | -0,005       | 8,98           | 1,16E-15       | 11--21          |
|                           |        |                                                                       | 2        | 498,25     | -0,006       | 6,62           | 1,36E-07       | 197-204         |
| Spot                      | AC     | Protein name                                                          | pI       | MW         | score        | cvg%           | peptides       |                 |
| 1627                      | Q9P2R7 | Succinyl-CoA ligase [ADP-forming] beta-chain, mitochondrial precursor | 7.05     | 50317      | 12,4         | 4              | 2              |                 |
| <b>Sequenced peptides</b> |        |                                                                       | <b>z</b> | <b>m/z</b> | <b>d m/z</b> | <b>z-score</b> | <b>p-value</b> | <b>position</b> |
|                           |        |                                                                       | 2        | 669,82     | -0,010       | 5,65           | 4,67E-05       | 166-175         |
|                           |        |                                                                       | 2        | 593,78     | -0,006       | 6,71           | 5,21E-08       | 275-284         |
| Spot                      | AC     | Protein name                                                          | pI       | MW         | score        | cvg%           | peptides       |                 |
| 1628                      | Q96I99 | Succinyl-CoA ligase [GDP-forming] beta-chain, mitochondrial precursor | 6.15     | 46511      | 58,79        | 18             | 7              |                 |
| <b>Sequenced peptides</b> |        |                                                                       | <b>z</b> | <b>m/z</b> | <b>d m/z</b> | <b>z-score</b> | <b>p-value</b> | <b>position</b> |
|                           |        |                                                                       | 2        | 608,78     | 0,028        | 10             | 2,2E-20        | 356-366         |
|                           |        |                                                                       | 2        | 594,28     | 0,042        | 8,97           | 8,06E-16       | 290-301         |
|                           |        |                                                                       | 2        | 542,25     | 0,029        | 8,83           | 2,25E-15       | 302-310         |
|                           |        |                                                                       | 2        | 561,76     | 0,035        | 8,28           | 3,3E-13        | 1--9            |
|                           |        |                                                                       | 2        | 620,77     | 0,044        | 8,12           | 7,93E-13       | 114-123         |
|                           |        |                                                                       | 2        | 596,27     | 0,044        | 7,79           | 1,38E-11       | 154-163         |
|                           |        |                                                                       | 2        | 620,74     | 0,047        | 6,63           | 1,45E-08       | 223-232         |
| Spot                      | AC     | Protein name                                                          | pI       | MW         | score        | cvg%           | peptides       |                 |
| 1633                      | Q94905 | SPFH domain-containing protein 2 precursor (Erlin-2)                  | 5.47     | 37840      | 23,670       | 10             | 3              |                 |
| <b>Sequenced peptides</b> |        |                                                                       | <b>z</b> | <b>m/z</b> | <b>d m/z</b> | <b>z-score</b> | <b>p-value</b> | <b>position</b> |
|                           |        |                                                                       | 2        | 653,87     | -0,015       | 10             | 2,83E-20       | 221-232         |
|                           |        |                                                                       | 2        | 579,77     | -0,015       | 7,36           | 3,34E-10       | 182-190         |
|                           |        |                                                                       | 2        | 674,86     | -0,008       | 6,26           | 1,64E-06       | 61-72           |
| Spot                      | AC     | Protein name                                                          | pI       | MW         | score        | cvg%           | peptides       |                 |
| 1635                      | Q96I99 | Succinyl-CoA ligase [GDP-forming] beta-chain, mitochondrial precursor | 6.15     | 46511      | 21,63        | 8              | 3              |                 |
| <b>Sequenced peptides</b> |        |                                                                       | <b>z</b> | <b>m/z</b> | <b>d m/z</b> | <b>z-score</b> | <b>p-value</b> | <b>position</b> |
|                           |        |                                                                       | 2        | 608,82     | -0,007       | 7,85           | 1,83E-11       | 356-366         |
|                           |        |                                                                       | 2        | 620,796    | -0,0125      | 7,26           | 1,06E-09       | 223-232         |
|                           |        |                                                                       | 2        | 561,80     | -0,009       | 6,51           | 3,14E-07       | 1--9            |

## Differential Microsomal proteins

### RuvB-like 2

| 4hpi/Mock |       | 8hpi/Mock |       |
|-----------|-------|-----------|-------|
| T-test    | Ratio | T-test    | Ratio |
| 0,0028    | 1,73  | n.s       | n.d   |

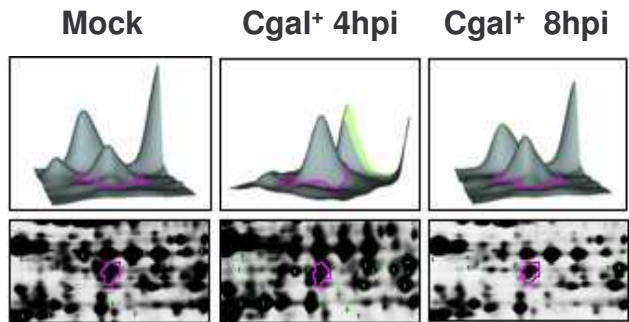

### Bax-interacting factor 1 (Bif-1)

| 4hpi/Mock |       | 8hpi/Mock |       |
|-----------|-------|-----------|-------|
| T-test    | Ratio | T-test    | Ratio |
| 0,045     | -1,57 | 0,034     | -1,46 |

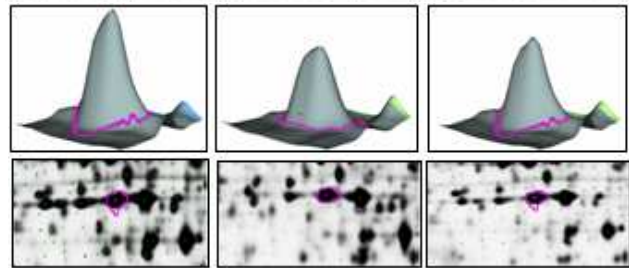

### Succinyl-CoA ligase [ADP forming] beta chain

| 4hpi/Mock |       | 8hpi/Mock |       |
|-----------|-------|-----------|-------|
| T-test    | Ratio | T-test    | Ratio |
| 0,031     | -1,81 | 0,026     | -1,54 |

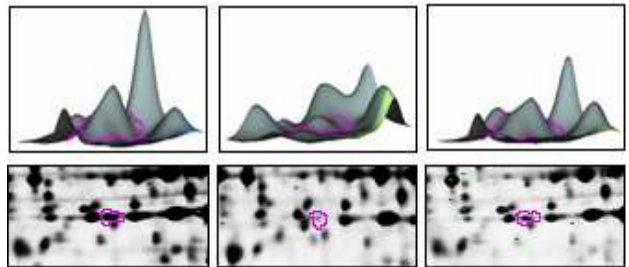

### Succinyl-CoA ligase [GDP forming] beta chain

| 4hpi/Mock |       | 8hpi/Mock |       |
|-----------|-------|-----------|-------|
| T-test    | Ratio | T-test    | Ratio |
| 0,034     | -1,48 | 0,028     | -1,53 |

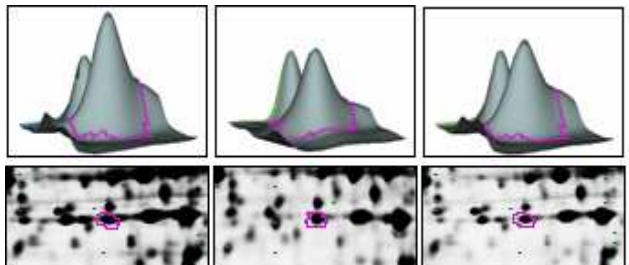

### Erlin-2

| 4hpi/Mock |       | 8hpi/Mock |       |
|-----------|-------|-----------|-------|
| T-test    | Ratio | T-test    | Ratio |
| 0,045     | -1,7  | 0,012     | -1,7  |

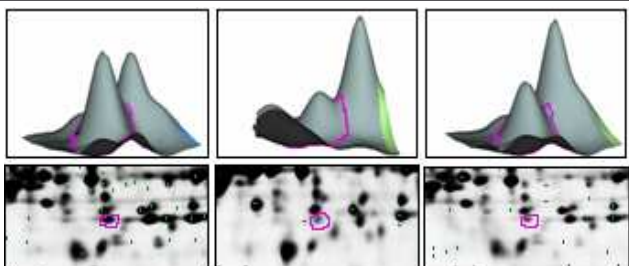

### Succinyl-CoA ligase [GDP forming] beta chain

| 4hpi/Mock |       | 8hpi/Mock |       |
|-----------|-------|-----------|-------|
| T-test    | Ratio | T-test    | Ratio |
| 0,0069    | -2,17 | 0,0064    | -1,75 |

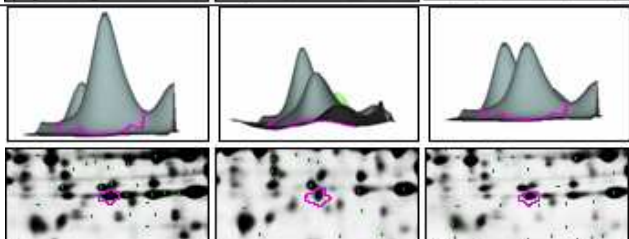

## Differential microsomal proteins in HSV-1 Cgal<sup>+</sup>-infected Huh7 cells

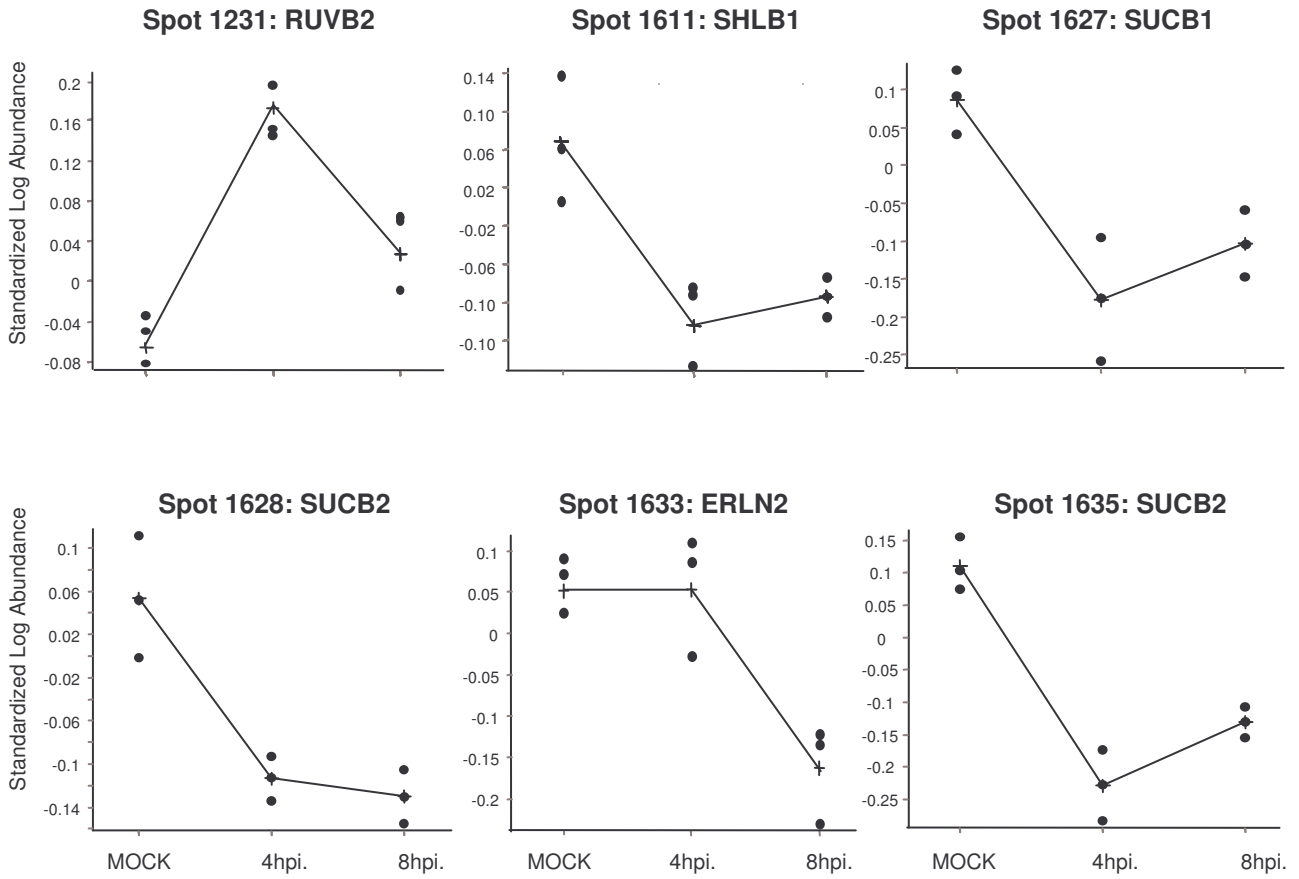

Supplement: M800202-MCP200_1.pdf [file M800202-MCP200_1.pdf]
